# Supplementary material for: Heme oxygenase-1 promoter region (GT)n polymorphism associates with increased neuroimmune activation and risk for encephalitis in HIV infection
Source: Springer Nature journal article supplement (doi:10.1186/s12974-018-1102-z), 2018-03-06
Supplement: MOESM1 [file 15513538]

## Supplementary Figures

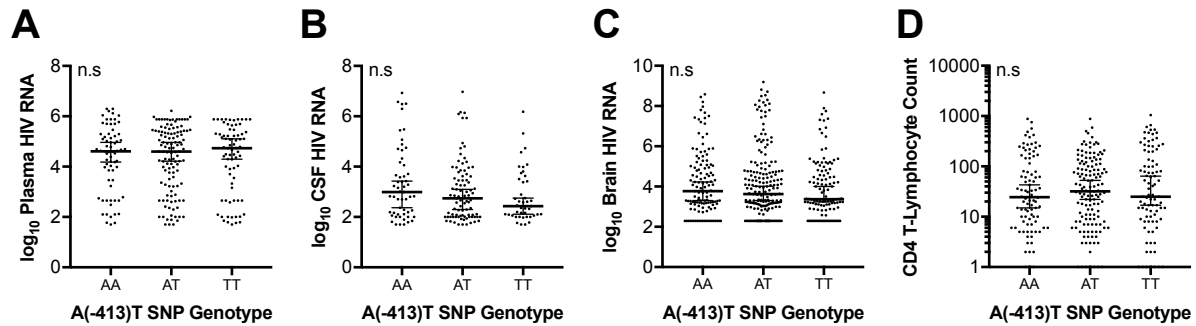

**Supplementary Figure 1: HO-1 A(-413)T SNP does not associate with plasma or CNS viral load or blood CD4 T-cell count in HIV-infected individuals.** (A) Plasma viral load (copies/ml), (B) CSF viral load (copies/ml), (C) brain parenchyma viral load (copies/g), and (D) peripheral blood CD4 T-lymphocyte count (cells/mm<sup>3</sup>) in HIV+ individuals with AA, AT, and TT A(-413)T SNP genotypes. Lines and error bars indicate median  $\pm$  95% confidence interval. Differences between groups were analyzed by Kruskal-Wallis test. n.s. = not significant.

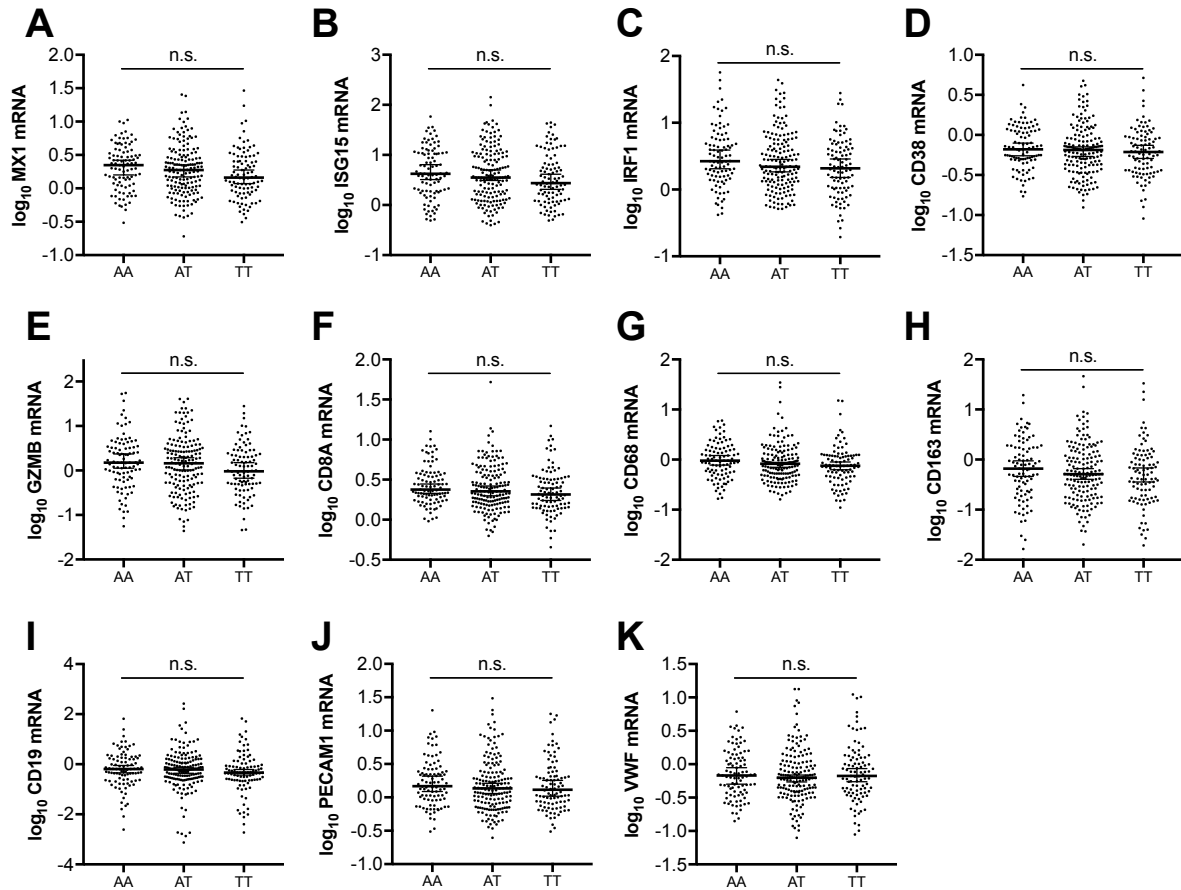

**Supplementary Figure 2: HO-1 A(-413)T SNP does not associate with prefrontal cortex**

**neuroimmune marker expression.** Prefrontal cortex RNA expression of neuroimmune markers was compared between HIV-infected subjects (without HIVE) with AA, AT, and TT genotypes of the HO-1 promoter region A(-413)T SNP. Neuroimmune markers analyzed were (A) MX1, (B) ISG15, (C) IRF1, (D) CD38, (E) GZMB, (F) CD8A, (G) CD68, (H) CD163, (I) CD19, (J) PECAM1, and (K) VWF. Lines and error bars indicate median  $\pm$  95% confidence interval of  $\log_{10}$  transformed RNA expression data. Differences between groups were analyzed by Kruskal-Wallis test.. n.s. = not significant
